# Supplementary material
Source: PubMed Central journal article supplement (PMC3757667)

## ONLINE SUPPLEMENT

### SUPPLEMENTARY METHODS

**XBP-1 mRNA splicing:** Total RNA was isolated using Trizol reagent (Sigma; St. Louis, MO). To detect whether IRE1 $\alpha$  was active, PCR was used to amplify a 600-bp cDNA encompassing nucleotides 571-1144 of the *XBP-1* mRNA sequence. Digestion of the unprocessed *XBP-1* with the restriction enzyme *Pst* I normally yields fragments of ~300-bp. However, cleavage by active IRE1 $\alpha$  of a 26-nt segment in *XBP-1* mRNA yields a 574-bp amplification product and removes the *Pst* I restriction site. Endogenous *XBP-1* mRNA was amplified by RT-PCR using the following primers: sense 5'-AAA CAG AGT AGC GCA GAC TGC-3'; antisense 5'-GGA TCT CTA AAA CTA GAG GCT TGG TG-3'. The PCR product was then digested with *Pst* I for 2 h at 37° C and detected on 2% agarose gels.

### SUPPLEMENTARY FIGURE LEGENDS

**Suppl. Fig. 1. PERK phosphorylation in RASMC.** Analysis of phospho-PERK (P-PERK) and PERK in RASMC treated with HNE: Cells were treated with HNE (50  $\mu$ M) for 30 min and the lysates were collected for Western analysis with P-PERK and total PERK antibodies.

**Suppl. Fig. 2. Activation of the IRE1 $\alpha$  pathway, as detected by XBP-1 splicing, in RASMC.** Cells were treated with vehicle (CTRL), HNE (50  $\mu$ M), or tunicamycin (Tm; 10  $\mu$ g/ml) for 30 min or 2 h, as indicated. After isolation of mRNA, the *XBP-1* mRNA product was amplified by PCR, digested with *Pst* I, and separated by electrophoresis. Loss of the *Pst* I restriction site is indicated by the processed form of *XBP-1* and suggests activation of the IRE1 pathway. Undigested PCR products were used as loading controls.

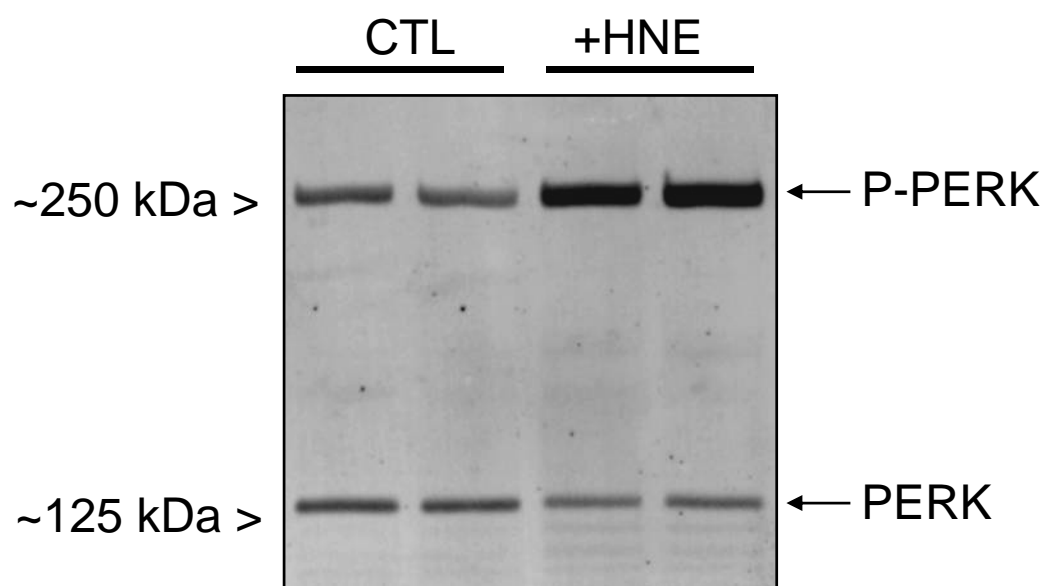

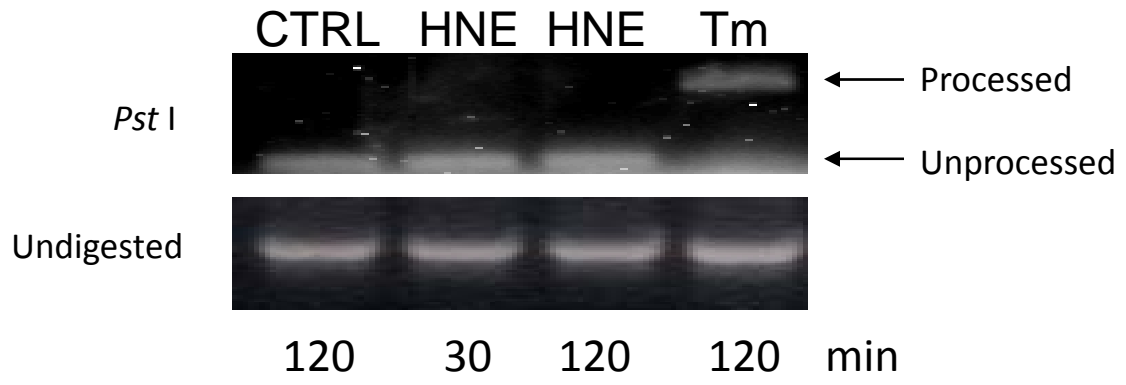

Supplement: mmc1.pdf [file mmc1.pdf]
